# Supplementary material
Source: ML conference proceedings conference paper supplement (https://proceedings.neurips.cc/paper_files/paper/2019/hash/a660d4563b8f62dd5282319cc643d950-Abstract.html)
Supplement: Supplementary file [file a660d4563b8f62dd5282319cc643d950-Supplemental.zip]

## 406 A Appendix

### 407 A.1 Equation details the for Linear dynamics experiment

#### 408 Linear and Gaussian dataset matrices:

409 The differential equations that describe the dynamics are ( $c = 0.06, \tau = 0.17$ ):

$$\frac{\partial p}{\partial t} = v, \quad \frac{\partial v}{\partial t} = a - cv, \quad \frac{\partial a}{\partial t} = -\tau v \quad (22)$$

410 Therefore, the dynamics matrix is defined as:

$$\dot{x} = \mathbf{A}x = \begin{bmatrix} 0 & 1 & 0 \\ 0 & -c & 1 \\ 0 & -\tau c & 0 \end{bmatrix} \begin{bmatrix} p \\ v \\ a \end{bmatrix} \quad (23)$$

411 Using the following Taylor expansion we find the transition matrix  $\tilde{\mathbf{F}}$

$$\tilde{\mathbf{F}} = \mathbf{I} + \sum_{k=1}^K \frac{(\mathbf{A}\Delta t)^k}{k!} \quad (24)$$

412 The transition matrix  $\tilde{\mathbf{F}}$  for each dimension is:

$$\tilde{\mathbf{F}} = \begin{bmatrix} 1 & \Delta t - \frac{c}{2}\Delta t^2 & \frac{\Delta t^2}{2} \\ 0 & 1 - c\Delta t + \frac{c^2}{2}\Delta t^2 & \Delta t - \frac{c}{2}\Delta t^2 \\ 0 & -\tau c + \frac{\tau c}{2}\Delta t^2 & 1 - \frac{\tau}{2}\Delta t^2 \end{bmatrix} \quad (25)$$

413 Then, the transition matrix and noise distributions are:

$$\mathbf{F} = \begin{bmatrix} \tilde{\mathbf{F}} & \mathbf{0} \\ \mathbf{0} & \tilde{\mathbf{F}} \end{bmatrix}, \tilde{\mathbf{Q}} = \begin{bmatrix} \Delta t/3 & 0 & 0 \\ 0 & \Delta t & 0 \\ 0 & 0 & 3\Delta t \end{bmatrix}, \mathbf{Q} = 0.1^2 \begin{bmatrix} \tilde{\mathbf{Q}} & \mathbf{0} \\ \mathbf{0} & \tilde{\mathbf{Q}} \end{bmatrix},$$

414 The measurement matrix and noise distribution are:

$$\mathbf{H} = \begin{bmatrix} 1 & 0 & 0 & 0 & 0 & 0 \\ 0 & 0 & 0 & 1 & 0 & 0 \end{bmatrix}, \mathbf{R} = 0.5^2 \begin{bmatrix} 1 & 0 \\ 0 & 1 \end{bmatrix}$$

#### 415 Linear and Gaussian matrices used for hybrid and GM-messages models:

416 The differential equations that describe the dynamics are:

$$\frac{\partial p}{\partial t} = v, \quad \frac{\partial v}{\partial t} = 0, \quad \frac{\partial a}{\partial t} = 0 \quad (26)$$

417 Then the transition matrix given the last equations is:

$$\tilde{\mathbf{F}} = \begin{bmatrix} 1 & \Delta t \\ 0 & 1 \end{bmatrix} \quad (27)$$

418 And the transition matrix and noise distributions are:

$$\mathbf{F} = \begin{bmatrix} \tilde{\mathbf{F}} & \mathbf{0} \\ \mathbf{0} & \tilde{\mathbf{F}} \end{bmatrix}, \tilde{\mathbf{Q}} = \begin{bmatrix} \Delta t & 0 \\ 0 & \Delta t \end{bmatrix}, \mathbf{Q} = \begin{bmatrix} \sigma^2 \tilde{\mathbf{Q}} & 0 \\ 0 & \sigma^2 \tilde{\mathbf{Q}} \end{bmatrix}, \quad (28)$$

419 Finally the measurement distribution matrices are:

$$\mathbf{H} = \begin{bmatrix} 1 & 0 & 0 & 0 & 0 & 0 \\ 0 & 0 & 0 & 1 & 0 & 0 \end{bmatrix}, \mathbf{R} = 0.5^2 \begin{bmatrix} 1 & 0 \\ 0 & 1 \end{bmatrix}$$

420 Such that the only parameter to optimize from the graphical model is the variance of the transition  
421 noise distribution  $\sigma$

422 **A.2 Equation details for the NCLT dataset**

423 For the NCLT dataset we use the uniform velocity motion equations. The differential equations that  
 424 describe the dynamics are:

$$\frac{\partial p}{\partial t} = v, \quad \frac{\partial v}{\partial t} = 0, \quad \frac{\partial a}{\partial t} = 0 \quad (29)$$

425 Such that the transition matrix for one component is:

$$\tilde{\mathbf{F}} = \begin{bmatrix} 1 & \Delta t \\ 0 & 1 \end{bmatrix}, \quad (30)$$

426 And the transition matrix and noise distribution are:

$$\mathbf{F} = \begin{bmatrix} \tilde{\mathbf{F}} & 0 \\ 0 & \tilde{\mathbf{F}} \end{bmatrix}, \tilde{\mathbf{Q}} = \begin{bmatrix} \Delta t & 0 \\ 0 & \Delta t \end{bmatrix} \mathbf{Q} = \begin{bmatrix} \sigma^2 \tilde{\mathbf{Q}} & 0 \\ 0 & \sigma^2 \tilde{\mathbf{Q}} \end{bmatrix}, \quad (31)$$

427 Finally the measurement distribution matrices are:

$$\mathbf{H} = \begin{bmatrix} 1 & 0 & 0 & 0 \\ 0 & 0 & 1 & 0 \end{bmatrix}, \mathbf{R} = \lambda^2 \begin{bmatrix} 1 & 0 \\ 0 & 1 \end{bmatrix}$$

428 Such that the only parameters to optimize from the graphical model is the variance of the noise and  
 429 measurement distributions  $\sigma$  and  $\lambda$ .
